# Supplementary material
Source: Springer Nature journal article supplement (https://www.springermedizin.de/resource/supplementary/12984_2010_300_MOESM1_ESM.pdf/9605724)
Supplement: MOESM1 [file 9605724]

Rest  
phase

Stimulation  
phase

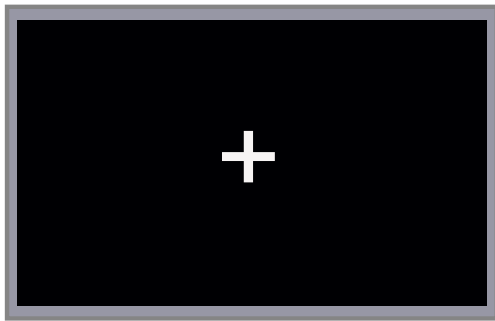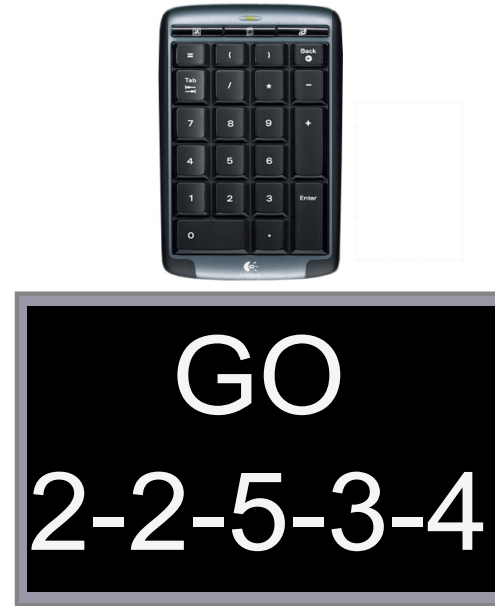

20 s

15 s

12 trials

rest: fixation, motionless

task: MI-simple  
MI-complex  
control: ME-simple  
ME-complex
